# Supplementary material for: Regioselective N-substitution of cyclen with two different alkyl groups: synthesis of all possible isomersElectronic supplementary information (ESI) available: spectroscopic data. See http://www.rsc.org/suppdata/cc/b2/b212667b/
Source: Royal Society of Chemistry journal article supplement (doi:10.1039/b212667b), 2003-02-25
Supplement: b212667b.doc [file b212667b.doc]

# Spectroscopic data of compounds

**1,4,7-Triformyl-10-(4-(*tert*-butyl)benzyl)-1,4,7,10-tetraazacyclododecane (1a).** 1H NMR (CDCl3, 300 MHz)  1.28 (s, 9H), 2.66 – 2.80 (m, 4H), 3.28 – 3.73 (m, 12H), 3.78 (s, 2H), 7.11 (dd, *J* = 11.0, 11.1 Hz, 2H), 7.33 (dd, *J* = 11.0, 11.1 Hz, 2H), 7.88 – 8.18 (m, 3H); 13C NMR (CDCl3, 75 MHz)  31.4 (C*C*H3), 34.6 (*C*CH3), 42.2, 43.3, 43.7, 44.1, 44.6, 45.4, 46.2, 46.8, 46.9, 48.1, 49.0, 50.3, 52.1, 54.2, 54.4, 54.8, 55.3, 56.5, 56.7, 57.4, 125.4 & 125.7 (Ph ring *C*H), 130.1 & 130.3 (Ph ring *C*H), 132.0 & 132.3 (Ph ring *C*), 151.0 & 151.3 (Ph ring *C*), 163.3, 163.4, 163.5, 163.6 & 163.8 (N*C*HO). Anal*.* Calcd for C22H34N4O3H2O: C, 62.83; H, 8.63; N, 13.32. Found: C, 63.79; H, 8.92; N, 12.50. HRMS (FAB): *m/z* 409.2789 ([M + Li]+, C22H34N4O3Li, calcd 409.2791).

**1,4,7-Tri(carboxymethyl)-10-(4-(*tert*-butyl)benzyl)-1,4,7,10-tetraazacyclododecane (14HCl).** 1H NMR (D2O, 300 MHz)  1.28 (s, 9H), 3.05 – 3.16 (br m, 10H), 3.41 (br m, 6H), 3.49 (br s, 4H), 4.06 (br s, 2H), 4.46 (br s, 2H), 7.47 (d, *J* = 8.1 Hz, 2H), 7.54 (br d, *J* = 8.1 Hz, 2H); 13C NMR (D2O, 75 MHz)  33.3 (C*C*H3), 37.1 (*C*CH3), 51.0 (br), 51.2 (br), 52.6 (b) 54.4 (br), 56.1 (*C*H2CO2), 58.0 (*C*H2CO2), 60.4 (*C*H2Ph), 129.7 (Ph ring *C*H), 133.5 (Ph ring *C*H), 133.8 & 133.9 (Ph ring *C*), 157.1 (v br, Ph ring *C*), 176.1 (v br, CO2).

**4,7-Bis(4-(*tert*-butyl)benzyl)-1,4,7,10-tetraazabicyclo[8,2,2]tetradecane-11,12-dione (2a).** 1H NMR (CDCl3, 300 MHz)  1.26 (s, 18H), 2.25 (m, 2H), 2.42 (br d, *J* = 14.4 Hz, 2H), 2.59 (m, 4H), 2.89 (m, 2H), 3.38 (m, 4H), 3.53 (m, 2H), 4.12 (br d, *J* = 13.8 Hz, 2H), 4.32 (br s, 2H), 7.07 (d, *J* = 7.4 Hz, 4H), 7.30 (d, *J* = 7.4 Hz, 4H); 13C NMR (CDCl3, 75 MHz)  31.4 (C*C*H3), 34.5 (*C*CH3), 47.6, 49.7, 52.5, 55.7, 58.6 (*C*H2Ph), 125.3, 129.5, 135.6, 150.3, 160.0 (N*C*O). Anal*.* Calcd for C32H46N4O2: C, 74.09; H, 8.94; N, 10.80. Found C, 74.42; H, 9.15; N, 10.79.

**1,4-Bis(carboxymethyl)-7,10-bis(4-(*tert*-butyl)benzyl)-1,4,7,10-tetraazacyclododecane4HCl (24HCl).** 1H NMR (CD3OD, 300 MHz)  1.22 (s, 18H), 3.30 – 3.50 (br m, 20H), 3.95 (br s, 4H), 7.39 (s, 8H); 13C NMR (CD3OD, 75 MHz)  31.7 (C*C*H3), 35.6 (*C*CH3), 50.5 (br, cyclen ring *C*H2), 51.4 (br, cyclen ring *C*H2), 51.7 (br, cyclen ring *C*H2), 54.9 (*C*H2CO2), 58.5 (*C*H2Ph), 127.4 (Ph ring *C*), 127.5 (Ph ring *C*H), 131.9 (Ph ring *C*H), 153.8 (Ph ring *C*). HRMS (FAB): *m/z* 581.4074 ([M + H]+, C34H53N4O4, calcd 581.4067).

**1,7-Bis(benzyloxycarbonyl)-4,10-bis(4-(*tert*-butyl)benzyl)-1,4,7,10-tetraazacyclododecane (3a).** 1H NMR (CDCl3, 300 MHz)  1.27 (s, 18H), 2.64 (br d, *J* = 21 Hz, 8H), 3.31-3.47 (br m, 8H), 3.55 (br s, 4H), 4.89 (br s, 4H), 7.18 (br m, 10H), 7.27 (m, 8H); 13C NMR (CDCl3, 75 MHz)  31.3 (C*C*H3), 34.3 (*C*CH3), 45.0, 46.6, 47.6, 54.4 (N*C*H2Ph), 59.2, 59.9, 60.2, 66.8 (O*C*H2Ph), 125.1, 127.8, 128.0, 128.9, 135.8, 136.8, 149.7, 156.4 (N*C*O2). Anal*.* Calcd for C46H60N4O4: C, 75.37; H, 8.25; N, 7.64. Found: C, 75.18; H, 8.53; N, 7.36.

**1,7-Bis(carboxymethyl)-4,10-bis(4-(*tert*-butyl)benzyl)-1,4,7,10-tetraazacyclododecane4HCl (34HCl).** 1H NMR (D2O, 300 MHz)  1.28 (s, 18H), 2.82 (s, 4H), 2.91 (br d, *J* = 15.6 Hz, 4H), 3.08 (br d, *J* = 15.6 Hz, 4H), 3.42 (br s, 8H), 4.45 (s, 4H), 7.51 (d, *J* = 8.0 Hz, 4H), 7.58 (d, *J* = 8.0 Hz, 4H); 13C NMR (D2O, 75 MHz)  30.0 (C*C*H3), 33.9 (*C*CH3), 47.9, 49.9, 53.2 (*C*H2CO2), 57.8 (*C*H2Ph), 125.4, 126.6, 130.8, 154.4, 173.9 (CH2*C*O2). Anal*.* Calcd for C34H52N4O44HCl: C, 56.20; H, 7.77; N, 7.71. Found: C, 56.45; H, 8.32; N, 7.91. HRMS (FAB): *m/z* 581.4069 ([M + H]+, C34H53N4O4, calcd 581.4067).

**1-(Benzyloxycarbonyl)-4,7,10-tris(4-(*tert*-butyl)benzyl)-1,4,7,10-tetraazacyclododecane (4a).** 1H NMR (CDCl3, 300 MHz)  1.25 (s, 9H), 1.31 (s, 9H), 1.32 (s, 9H), 2.57 (br s, 8H), 2.88 (br t, *J* = 5.7 Hz, 2H), 3.09 (br t, *J* = 5.7 Hz, 2H), 3.40 (s, 2H), 3.41 (s, 2H), 3.55 (s, 2H), 3.62 (br t, *J* = 5.7 Hz, 2H), 3.73 (br t, *J* = 5.7 Hz, 2H), 4.93 (s, 2H), 7.10 – 7.34 (m, 17H); 13C NMR (CDCl3, 75 MHz)  31.56 & 31.63 (C*C*H3), 34.53 & 34.61 (*C*CH3), 46.9, 48.0, 52.2, 52.5, 52.7, 53.4 & 53.5 (N*C*H2Ph), 59.0, 59.5, 59.9, 67.0 (O*C*H2Ph), 125.1 & 125.2 (NCH2Ph ring *C*H), 127.9, 128.0, 128.5, 128.9 & 129.0 (NCH2Ph ring *C*H), 136.6 & 136.7 (OCH2Ph ring *C*H), 136.9 & 137.2 (NCH2Ph ring *C*), 149.6 & 149.7 (NCH2Ph ring *C*), 156.6 (N*C*O2). Anal*.* Calcd for C49H68N4O2: C, 78.99; H, 9.20; N, 7.52. Found: C, 78.47; H, 9.40; N, 7.49.

**1-(Carboxymethyl)-4,7,10-tris(4-(*tert*-butyl)benzyl)-1,4,7,10-tetraazacyclododecane (44HCl).** 1H NMR (CDCl3, 300 MHz, no HCl)  1.28 (s, 27H), 2.75 (br s, 6H), 2.82 (br s, 6H), 3.12 (br s, 4H), 3.45 (s, 2H), 3.56 (s, 2H), 3.63 (br s, 4H), 6.90 (d, *J* = 7.8 Hz, 2H), 7.21 – 7.30 (m, 6H), 7.35 (d, *J* = 7.8 Hz, 4H); 13C NMR (CDCl3, 75 MHz, no HCl)  31.5 (C*C*H3), 34.7 (*C*CH3), 50.4, 50.6, 51.8, 54.7, 57.4, 57.7, 60.2, 125.5 & 125.7 (Ph ring *C*H), 129.8 & 130.0 (Ph ring *C*H), 131.7 & 133.4 (Ph ring *C*), 151.0 & 151.2 (Ph ring *C*), 171.6 (*C*O2). HRMS (FAB): *m/z* 669.5112 ([M + H]+, C43H65N4O2, calcd 669.5108).

**1,4,7-Triformyl-10-(benzyloxycarbonyl)-1,4,7,10-tetraazacyclododecane (5).** A mixture of cyclen (800 mg, 4.64 mmol) and chloral hydrate (3047 mg, 18.42 mmol) was dissolved in 30 ml of ethanol. The flask was stirred at 60 C for 4 h. The reaction mixture was concentrated under vacuum to dryness and dissolved in 30 ml of water again (pH 9, measured using pH paper). 1ml of benzyl chloroformate was added and the reaction was stirred for 1 h. pH of the solution was adjusted to pH 10 from pH 4 by using saturated Na2CO3 solution, then 1 ml of benzyl chloroformate was added again. After 1 h stirring, pH of the solution was adjusted to pH 10 again and 1 ml of benzyl chloroformate was added. The reaction mixture was allowed to stir overnight. The aqueous solution was extracted by methylene chloride (4  20 ml). The combined organic layer was washed by saturated NaHCO3, dried over MgSO4 and concentrated under vacuum to give a clear oil. The crude product was recrystallized from diethyl ether and dried under reduced pressure to give a hygroscopic white powder (1782 mg, 98%): 1H NMR (CDCl3, 300 MHz)  3.02 – 3.65 (m, 16H), 5.07 (s, 2H), 7.27 (br s, 5H), 7.88 – 8.09 (m, 3H); 13C NMR (CDCl3, 75 MHz)  43.0, 43.7, 43.8, 44.1, 44.7, 45.0, 45.8, 46.7, 46.9, 47.6, 48.1, 48.8, 49.4, 49.8, 50.1, 50.4, 50.5, 50.8, 52.2, 53.5 (cyclen ring *C*H2), 67.5, 67.6 (*C*H2Ph), 127.9, 128.3, 128.6, 129.0 (Ph ring *C*H), 135.8 (Ph ring *C*), 155.9, 156.8, 157.5 (*C*O2Ph), 163.0, 163.4, 163.6, 163.8, 163.9, 164.3, 164.6, 165.1, 165.7, 165.9 (N*C*HO). Anal*.* Calcd for C19H26N4O5H2O: C, 55.87; H, 6.91; N, 13.72. Found: C, 55.31; H, 6.68; N, 13.04. HRMS (ESI): *m/z* 413.1791 ([M + Na]+, C19H26N4O5Na, calcd 413.1801).

**1-(Benzyloxycarbonyl)-1,4,7,10-tetraazacyclododecane3HCl (63HCl).** 1,4,7-Triformyl-10-(benzyloxycarbonyl)-1,4,7,10-tetraazacyclododecane (731 mg, 1.87 mmol) was dissolved in 40 ml of 1 M HCl solution and the solution was stirred at 50 C for 5 h. Solvent was evaporated completely under vacuum at 60 C to give white solid. Crude product was refluxed in 20 ml of ethanol, cooled down to room temperature, filtrated, washed by 5 ml of ether and dried in air. Excess ether was added to ethanol filtrate to see cloudiness of solution. Precipitated white powder was collected, washed by small amount of ether and dried in air as second crop (633 mg, 81%): 1H NMR (D2O, 300 MHz)  3.19 (br s, 12H), 3.69 (br t, *J* = 5.1 Hz, 4H), 5.17 (s, 2H), 7.44 (br s, 5H); 13C NMR (D2O, 75 MHz)  45.8, 47.5, 48.2, 49.5, 71.6 (*C*H2Ph), 131.4, 131.8, 131.9, 138.7, 161.4 (*C*O2*C*H2). Anal*.* Calcd for C16H26N4O23HCl: C, 46.22; H, 7.03; N, 13.47; Cl, 25.58. Found: C, 45.67; H, 7.42; N, 12.94; Cl, 25.34. HRMS (FAB): *m/z* 307.2139 ([M + H]+, C16H27N4O2, calcd 307.2134).
